# Supplementary material
Source: publisher figshare collection journal article supplement (https://future-science-group.figshare.com/articles/dataset/_/22786637)
Supplement: Supplementary file 1 [file 1]

**Supplemental Fig S1.**

**Surgery images**. Images depict three types of cohorts. A) Sham injuries in which

nerve is not affected. B) Crush injury of nerve, C) Nerve fully severed and D) Repair technique

consisting of epineurial 9-0 nylon suture

**Supplemental Fig S2**

**Mean Normalized SFI values of control rats**. Data shows the longitudinal behavioral evolution of the Sham (transection alone) cohorts’ rats
